# Supplementary material for: Cooperativity within proximal phosphorylation sites is revealed from large-scale proteomics data
Source: Springer Nature journal article supplement (doi:10.1186/1745-6150-5-6), 2010-01-01

**Supplementary data S5.**

The distribution of the distance to the nearest phosphosite, for real phosphosites and random phosphosites – this data are partially shown in figure 2A, but the distance to nearest phosphosites was extended until the distance of 250 amino acids.


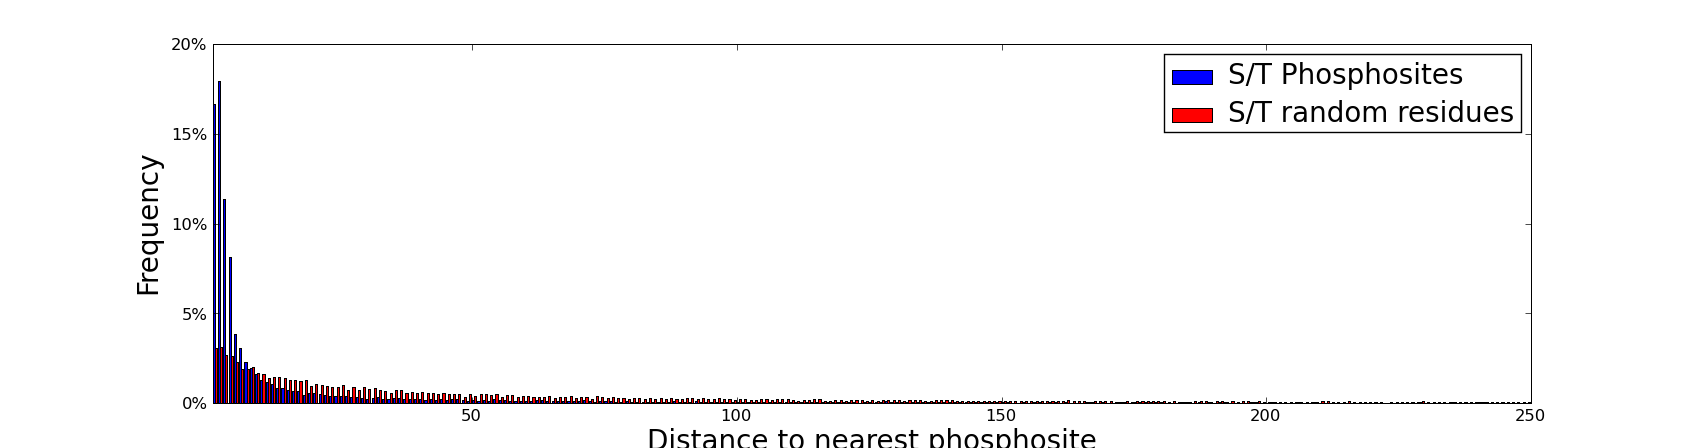

Supplement: Additional file 5 [file 1745-6150-5-6-s5.doc]
